# Supplementary material for: Identification of novel key amino acids at the interface of the transmembrane domains of human BST-2 and HIV-1 Vpu
Source: PubMed Central journal article supplement (PMC3751551; doi:10.1186/1742-4690-10-84), 2013-08-06
Supplement: 1742-4690-10-84-S1.pdf [file 1742-4690-10-84-S1.pdf]

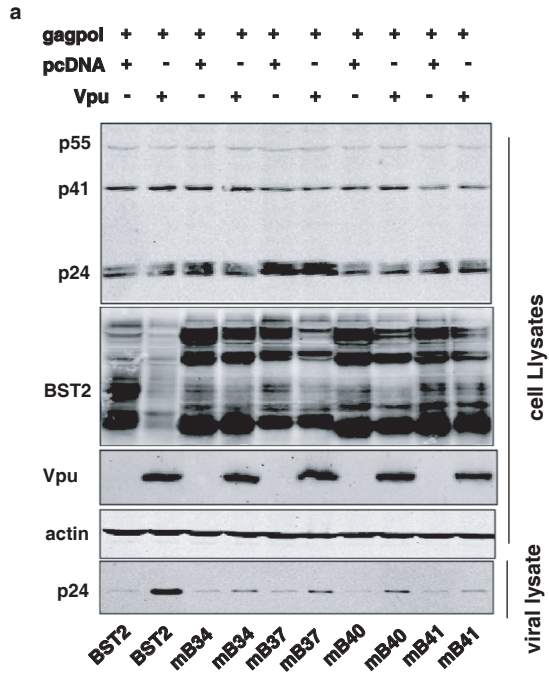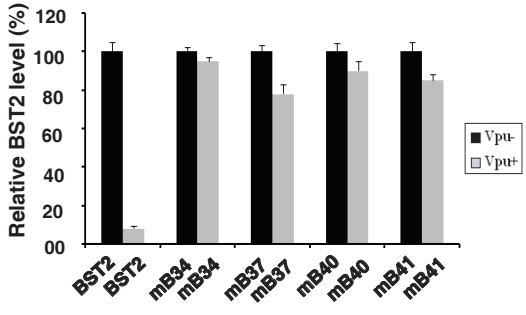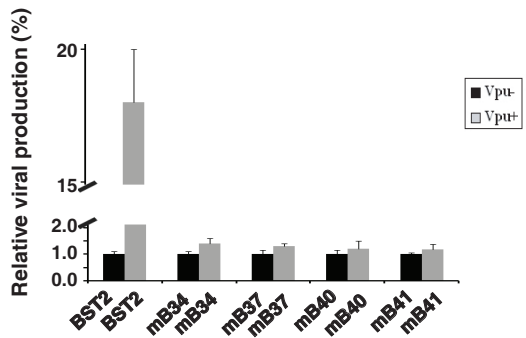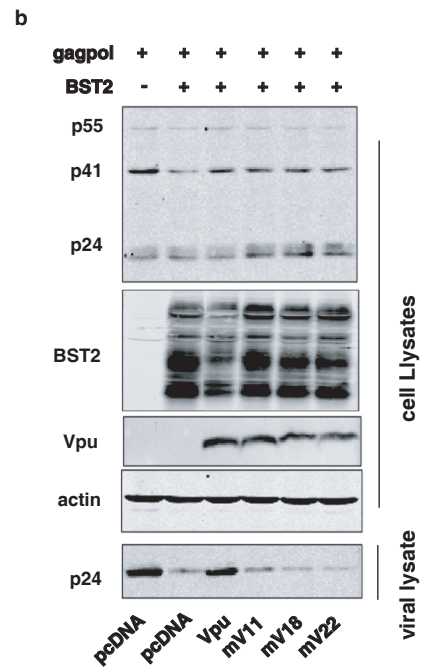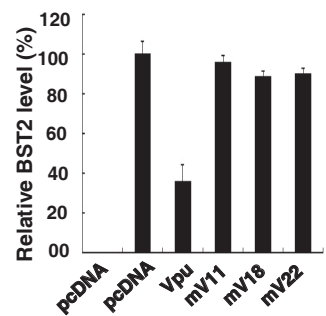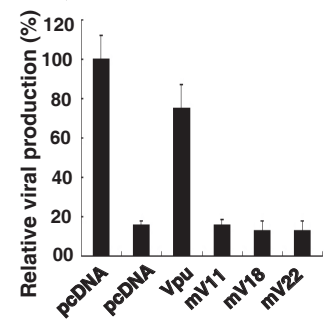

Figure S1
